# Supplementary material for: Assembled cobalt phosphide nanoparticles on carbon nanofibers as a bifunctional catalyst for hydrogen evolution reaction and oxygen evolution reaction
Source: Royal Society of Chemistry journal article supplement (doi:10.1039/d2se01128j), 2022-01-01
Supplement: d2se01128j1.pdf [file d2se01128j1.pdf]

## Supporting information

### Assembled cobalt phosphide nanoparticles on carbon nanofibers as a bifunctional catalyst for hydrogen evolution reaction and oxygen evolution reaction

Meixin Yu, Xu Guo, Xin Chang, Xinzhi Ma\* and Mingyi Zhang\*

#### 1. Supplementary Tables

Table S1. The activity comparison of CNF@CoP-CNTs with recently reported OER electrocatalysts in alkaline solution.

| Catalyst                                       | Electrolyte | $E_{j10}$ (mV)   | Ref.      |
|------------------------------------------------|-------------|------------------|-----------|
| CNF@CoP-CNTs                                   | 1 M KOH     | 367( $E_{j50}$ ) | This work |
| Co <sub>2</sub> P/Co <sub>2</sub> N@CNF-DNA(C) | 1 M KOH     | 360              | [1]       |
| NiCoP/CNF                                      | 1 M KOH     | 268              | [2]       |
| CoP/NC                                         | 1 M KOH     | 290              | [3]       |
| Fe-CoP NSs                                     | 1 M KOH     | 312              | [4]       |
| CoP-TiO <sub>x</sub>                           | 1 M KOH     | 337              | [5]       |
| CoP NFs                                        | 1 M KOH     | 323              | [6]       |
| CoP / NCS-400                                  | 1 M KOH     | 313              | [7]       |
| CoP / VGNHs                                    | 1 M KOH     | 300              | [8]       |
| O-CoP                                          | 1 M KOH     | 310              | [9]       |
| CoP@NPC                                        | 1 M KOH     | 300              | [10]      |
| N/MoeCoP@NPG                                   | 1 M KOH     | 201              | [11]      |
| CoP/CC                                         | 1 M KOH     | 176              | [12]      |
| Co <sub>3</sub> O <sub>4</sub>  CoP            | 1 M NaOH    | 320              | [13]      |

Table S2. The activity comparison of CNF@CoP-CNTs with recently reported HER electrocatalysts in acid solution.

| <b>Catalyst</b>                                         | <b>Electrolyte</b>                   | <b>E<sub>j10</sub>(mV)</b> | <b>Ref.</b> |
|---------------------------------------------------------|--------------------------------------|----------------------------|-------------|
| <b>CNF@CoP-CNTs</b>                                     | 0.5 M H <sub>2</sub> SO <sub>4</sub> | 65                         | This work   |
| <b>CoP-CNTs hybrids</b>                                 | 0.5 M H <sub>2</sub> SO <sub>4</sub> | 139                        | [14]        |
| <b>CoP nanosheets/MXene</b>                             | 0.5 M H <sub>2</sub> SO <sub>4</sub> | 97                         | [15]        |
| <b>Nanoporous CoPS</b>                                  | 0.5 M H <sub>2</sub> SO <sub>4</sub> | 107                        | [16]        |
| <b>CoP@P, N-C matrices</b>                              | 0.5 M H <sub>2</sub> SO <sub>4</sub> | 87                         | [17]        |
| <b>Al, Fe-CoP/rGO</b>                                   | 0.5 M H <sub>2</sub> SO <sub>4</sub> | 138                        | [18]        |
| <b>Ni-CoP hollow polyhedrons</b>                        | 0.5 M H <sub>2</sub> SO <sub>4</sub> | 144                        | [19]        |
| <b>CoP hollow Polyhedrons</b>                           | 0.5 M H <sub>2</sub> SO <sub>4</sub> | 159                        | [20]        |
| <b>CoP NWs</b>                                          | 0.5 M H <sub>2</sub> SO <sub>4</sub> | 110                        | [21]        |
| <b>CoP NPs combined with WSe<sub>2</sub> nanosheets</b> | 0.5 M H <sub>2</sub> SO <sub>4</sub> | 163                        | [22]        |
| <b>CoP/RGO</b>                                          | 0.5 M H <sub>2</sub> SO <sub>4</sub> | 105                        | [23]        |
| <b>Fe-CoP@CC</b>                                        | 0.5 M H <sub>2</sub> SO <sub>4</sub> | 80                         | [24]        |
| <b>Ni-CoP</b>                                           | 1 M KOH                              | 88                         | [25]        |

## 2. Supplementary Figures 1 to S6

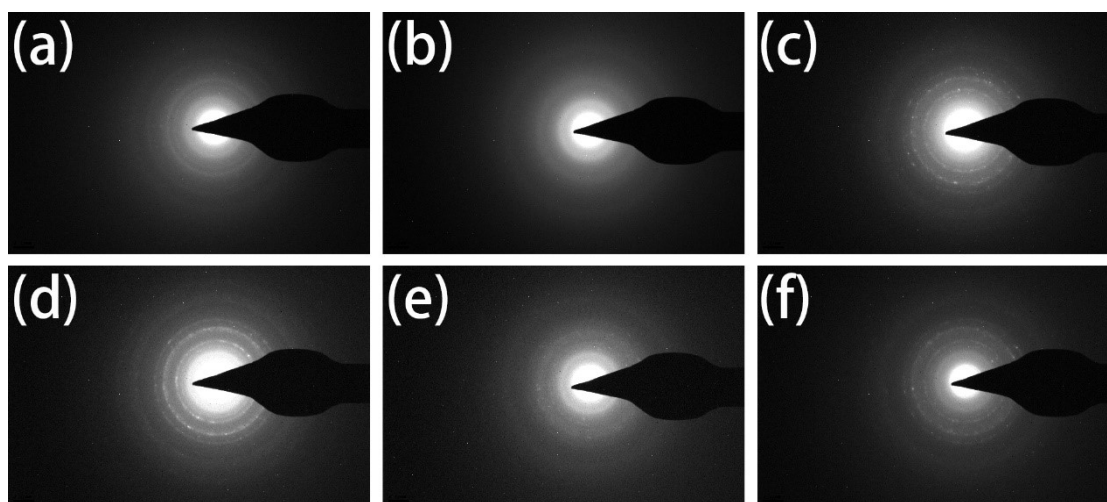

**Figure S1.** SAED patterns of (a) CNF @CoP-5-CNTs , (b) CNF@CoP-10-CNTs , (c) CNF@CoP-12-CNTs , (d) CNF@CoP-15-CNTs , (e) CNF@CoP-18-CNTs , and (f) CNF@CoP-20-CNTs , respectively.

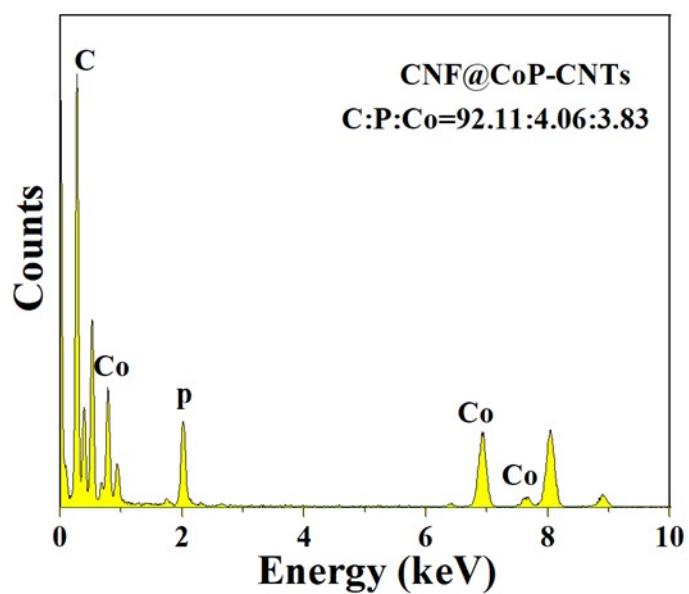

**Figure S2.** Energy dispersive X-ray spectroscopy (EDS) of CNF@CoP-15-CNTs.

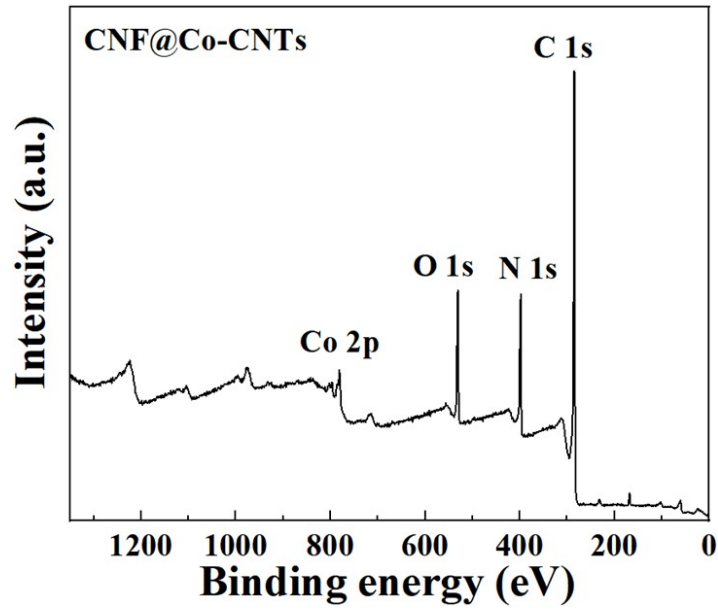

**Figure S3.** XPS survey spectra of CNF@Co-CNTs.

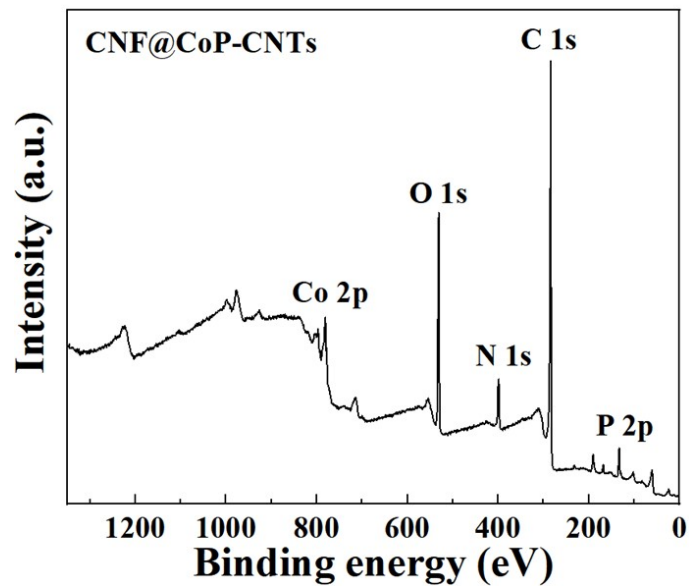

**Figure S4.** XPS survey spectra of CNF@CoP-15-CNTs.

The existence of Co and P elements was proved by the XPS survey spectrum of CNF@CoP-15-CNTs.

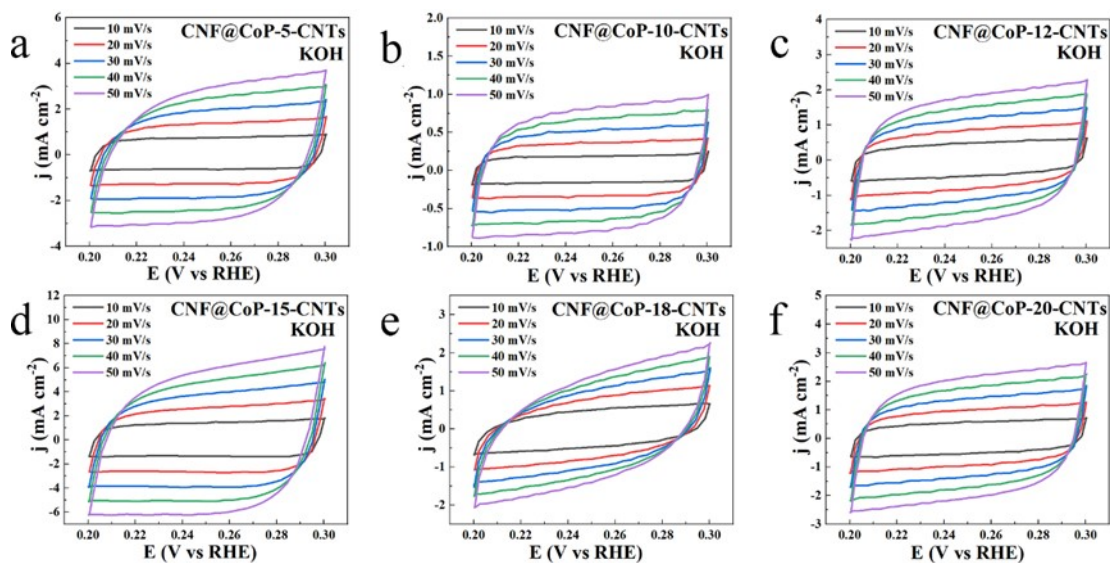

**Figure S5.** CV curves of (a) CNF@CoP-5-CNTs, (b) CNF@CoP-10-CNTs, (c) CNF@CoP-12-CNTs, (d) CNF@CoP-15-CNTs, (e) CNF@CoP-18-CNTs, and (f) CNF@CoP-20-CNTs measured in 1.0 M KOH solution at scan rates from 10 to 50  $\text{mV s}^{-1}$ .

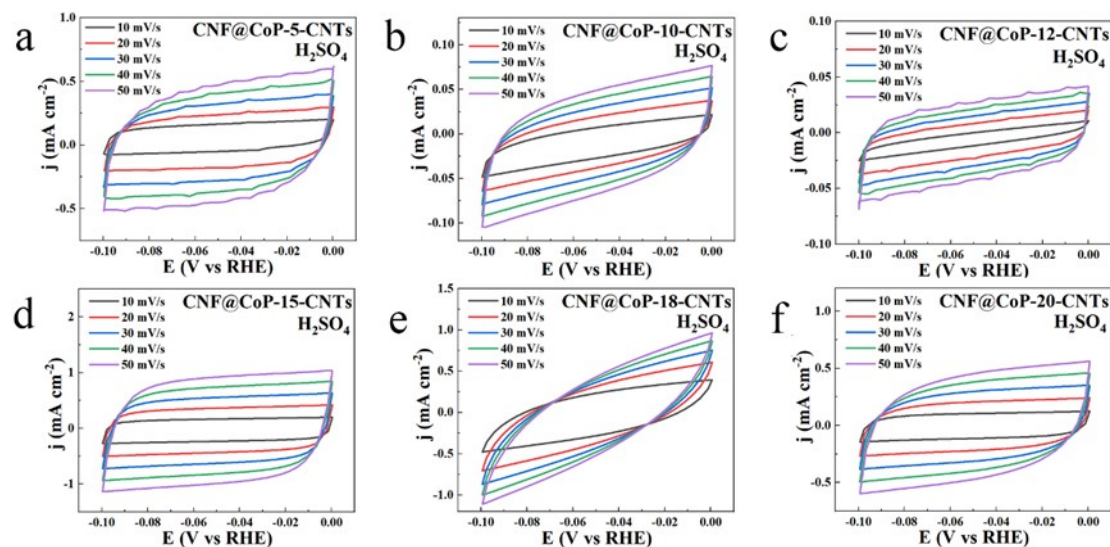

**Figure S6.** CV curves of (a) CNF@CoP-5-CNTs, (b) CNF@CoP-10-CNTs, (c) CNF@CoP-12-CNTs, (d) CNF@CoP-15-CNTs, (e) CNF@CoP-18-CNTs, and (f) CNF@CoP-20-CNTs measured in 0.5 M  $\text{H}_2\text{SO}_4$  solution at scan rates from 10 to 50  $\text{mV s}^{-1}$ .

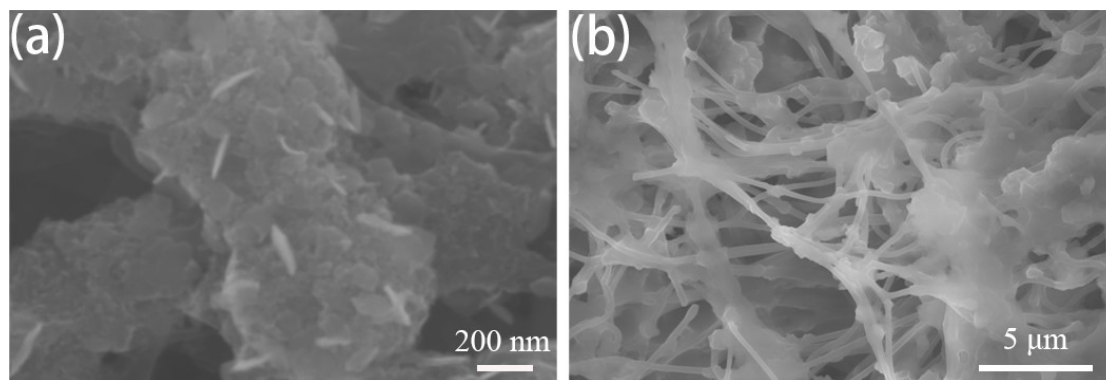

**Figure S7.** SEM images of CNF@CoP-15-CNTs post electrochemical catalysis. (a) OER. (b) HER.

#### 4. References

- 1 H. Li, X. Kong, X. Geng, C. Gu, Z. Liu, J. Wang, *Electrochimica. Acta.*, 2021, **367**, 137562.
- 2 S. Surendran, S. Shanmugapriya, A. Sivanantham, S. Shanmugam, R. K. Selvan, *Adv. Energy Mater.*, 2018, **8**, 1800555.
- 3 L. Feng, R. Ding, Y. Chen, J. Wang, L. Xu, *J. Power Sources*, 2020, **452**, 227837.
- 4 T. Chen, S. Qin, M. Qian, H. Dai, Y. Fu, Y. Zhang, B. Ye, Q. Lin, Q. Yang, *Energy Fuels*, 2021, **35**, 10890–10897.
- 5 Z. Liang, W. Zhou, S. Gao, R. Zhao, H. Zhang, Y. Tang, J. Chen, T. Qiu, B. Zhu, C. Qu, W. Gao, Q. Wang, R. Zou, *Small*, 2020, **16**, 1905075.
- 6 L. Ji, J. Wang, X. Teng, T. J. Meyer, Z. Chen, *ACS Catal.*, 2020, **10**, 412-419.
- 7 T. Yin, X. Zhou, A. Wu, H. Yan, Q. Feng, C. Tian, *Electrochim. Acta*, 2018, **276**, 362-369.
- 8 L. Truong, S. K. Jerng, S. B. Roy, J. H. Jeon, K. Kim, K. Akbar, Y. Yi, S. H. Chun, *ACS Sustainable Chem. Eng.*, 2019, **7**, 4625-4630.
- 9 G. Zhou, M. Li, Y. Li, H. Dong, D. Sun, X. Liu, L. Xu, Z. Tian, Y. Tang, *Adv. Funct. Mater.*, 2020, **30**, 1905252.
- 10 Z. Chen, H. Jia, J. Yuan, X. Liu, C. Fang, Y. Fan, C. Cao, Z. Chen, *Int. J. Hydrogen Energy*, 2019, **44**, 24342-24352.
- 11 K. Li, H. Ding, J. J. Zhou, W. Wang, P. Zhang, L. Wang, J. Wu, Y. Lei, C. Zhou, J. Liu, L. Chen, *ScienceDirect*, 2021, **8**, 0360-3199.
- 12 P. Ji, X. Luo, D. Chen, H. Jin, Z. Pu, W. Zeng, J. He, H. Bai, Y. Liao, S. Mu, *ACS Sustainable Chem. Eng.*, 2020, **8**, 17851–17859.
- 13 B. Malik, H. K. Sadhanala, R. Sun, F. L. Deepak, A. Gedanken, G. D. Nessim, *ACS Appl. Nano Mater.*, 2022, **5**, 9150–9158.
- 14 C. Wu, Y. Yang, D. Dong, Y. Zhang, J. Li, *Small*, 2017, **13**, 1602873.
- 15 L. Yan, B. Zhang, S. Wu, J. Yu, *J. Mater. Chem., A*, 2020, **8**, 14234–14242.
- 16 W. Hong, C. Jian, G. Wang, X. He, J. Li, Q. Cai, Z. Wen, W. Liu, *Appl. Catal. B- Environ.*, 2019, **251**, 213–219.
- 17 R. Boppella, J. Park, W. Yang, J. Tan, J. Moon, *Carbon*, 2020, **156**, 529–537.
- 18 S. F. Zai, Y. T. Zhou, C. C. Yang, Q. Jiang, *Chem. Eng. J.*, 2021, **421**, 127856.
- 19 Y. Pan, K. Sun, Y. Lin, X. Cao, Y. Cheng, S. Liu, L. Zeng, W. C. Cheong, D. Zhao, K. Wu, Z. Liu, Y. Liu, D. Wang, Q. Peng, C. Chen, Y. Li, *Nano Energy*, 2019, **56**, 411–419.
- 20 M. Liu, J. Li, *ACS Appl. Mater. Interfaces*, 2016, **8**, 2158–2165.
- 21 P. Jiang, Q. Liu, C. Ge, W. Cui, Z. Pu, A. M. Asiri, X. Sun, *J. Mater. Chem., A*, 2014, **2**, 14634–14640.
- 22 J. Qian, Z. Li, X. Guo, Y. Li, W. Peng, G. Zhang, F. Zhang, X. Fan, *Ind. Eng. Chem. Res.*, 2018, **57**, 483–489.
- 23 L. Jiao, Y. X. Zhou, H. L. Jiang, *Chem. Sci.*, 2016, **7**, 1690–1695.
- 24 Y. Yang, H. Meng, C. Kong, W. Ma, H. Zhu, F. Ma, C. Wang, Z. Hu,

*ScienceDirect*, 2021, **6**, 0360-3199.

- 25 Y. Zhao, J. Zhang, Y. Xie, B. Sun, J. Jiang, W. J. Jiang, S. Xi, H. Y. Yang, K. Yan, S. Wang, X. Guo, P. Li, Z. Han, X. Lu, H. Liu, G. Wang, *Nano Lett.*, 2021, **21**, 823–832.
